# Supplementary material
Source: publisher site journal article supplement (https://www.dovepress.com/article/560628)
Supplement: Supplementary file 1 [file Supplementary%20data.pdf]

**Table S1** Basic Information of Experts

| Item                        | Category            | n  | %    |
|-----------------------------|---------------------|----|------|
| Gender                      | Male                | 3  | 20   |
|                             | Female              | 12 | 80   |
| Age (years)                 | 30-39               | 1  | 6.7  |
|                             | 40-49               | 7  | 46.7 |
|                             | ≥50                 | 7  | 46.7 |
| Years of Work Experience    | 7-19                | 5  | 33.3 |
|                             | 20-29               | 5  | 33.3 |
|                             | ≥30                 | 5  | 33.3 |
| Professional Title          | Senior              | 9  | 60   |
|                             | Associate Senior    | 6  | 40   |
| Position                    | Department Director | 6  | 40   |
|                             | Head Nurse          | 2  | 13.3 |
|                             | No                  | 7  | 46.6 |
| Education Level             | Bachelor's Degree   | 3  | 20.0 |
|                             | Master's Degree     | 7  | 46.7 |
|                             | Doctoral Degree     | 5  | 33.3 |
| Graduate Student Supervisor | Master's Supervisor | 6  | 40   |
|                             | Doctoral Supervisor | 1  | 6.7  |
|                             | No                  | 8  | 53.3 |

**Notes:** n = number of experts; % = proportion within total sample.

**Table S2** Delphi Consultation Results

| Item    | Positive Coefficient of Experts | Authority Coefficient of Experts (Cr) | Degree of Concentration of Expert Opinions |            | Degree of Coordination of Expert Opinions |
|---------|---------------------------------|---------------------------------------|--------------------------------------------|------------|-------------------------------------------|
|         | Questionnaire Response Rate (%) | Cr                                    | Mj                                         | Kj         | Kendall's W                               |
| Round 1 | 75                              | 0.930                                 | 3.87-5.00                                  | 40%-100%   | 0.213                                     |
| Round 2 | 100                             | 0.944                                 | 3.73-5.00                                  | 6.67%-100% | 0.256                                     |

**Notes:** Positive Coefficient = questionnaire response rate, indicating the enthusiasm of experts; Authority Coefficient (Cr) = reflects the reliability of expert judgments; Mj = mean

importance score for each item;  $K_j$  = proportion of experts giving full marks to an item; Kendall's  $W$  = coefficient of concordance among experts.

**Table S3** Results of Item Analysis

| Item | Critical Ratio Method | Correlation Analysis | Cronbach's Alpha Coefficient ( $\alpha$ ) | Communality and Factor Loading Analysis | Number of Failing Criteria | Remarks  |
|------|-----------------------|----------------------|-------------------------------------------|-----------------------------------------|----------------------------|----------|
| K1   |                       |                      |                                           |                                         | 0                          | Retained |
| K2   |                       |                      |                                           |                                         | 0                          | Retained |
| K3   |                       |                      |                                           |                                         | 0                          | Retained |
| K4   |                       |                      |                                           |                                         | 0                          | Retained |
| K5   |                       |                      |                                           |                                         | 0                          | Retained |
| K6   |                       |                      |                                           |                                         | 0                          | Retained |
| K7   |                       |                      |                                           |                                         | 0                          | Retained |
| K8   |                       |                      |                                           |                                         | 0                          | Retained |
| K9   |                       |                      |                                           |                                         | 0                          | Retained |
| K10  |                       |                      |                                           |                                         | 0                          | Retained |
| K11  |                       |                      |                                           |                                         | 0                          | Retained |
| K12  |                       |                      |                                           |                                         | 0                          | Retained |
| K13  |                       |                      |                                           |                                         | 0                          | Retained |
| K14  |                       |                      |                                           |                                         | 0                          | Retained |
| K15  |                       |                      |                                           |                                         | 0                          | Retained |
| K16  |                       |                      |                                           |                                         | 0                          | Retained |
| K17  |                       |                      |                                           |                                         | 0                          | Retained |
| K18  |                       |                      |                                           |                                         | 0                          | Retained |
| K19  |                       |                      |                                           |                                         | 0                          | Retained |
| K20  |                       |                      |                                           |                                         | 0                          | Retained |
| K21  |                       |                      |                                           |                                         | 0                          | Retained |
| K22  |                       |                      |                                           |                                         | 0                          | Retained |
| A1   |                       |                      |                                           |                                         | 0                          | Retained |
| A2   |                       |                      |                                           | √                                       | 1                          | Retained |
| A3   |                       |                      |                                           | √                                       | 1                          | Retained |
| A4   |                       |                      |                                           | √                                       | 1                          | Deleted  |
| A5   |                       |                      |                                           |                                         | 0                          | Retained |
| A6   |                       | √                    | √                                         | √                                       | 3                          | Deleted  |
| A7   |                       | √                    | √                                         | √                                       | 4                          | Deleted  |
| A8   |                       |                      |                                           |                                         | 0                          | Retained |
| A9   |                       |                      |                                           |                                         | 0                          | Retained |
| A10  |                       | √                    | √                                         | √                                       | 3                          | Deleted  |
| A11  |                       |                      |                                           |                                         | 0                          | Retained |
| A12  |                       |                      |                                           |                                         | 0                          | Retained |

|            |  |   |   |   |   |          |
|------------|--|---|---|---|---|----------|
| <b>A13</b> |  |   |   |   | 0 | Retained |
| <b>A14</b> |  |   |   |   | 0 | Retained |
| <b>P1</b>  |  |   |   |   | 0 | Retained |
| <b>P2</b>  |  | √ | √ | √ | 3 | Deleted  |
| <b>P3</b>  |  |   |   |   | 0 | Retained |
| <b>P4</b>  |  |   |   |   | 0 | Retained |
| <b>P5</b>  |  |   |   |   | 0 | Retained |
| <b>P6</b>  |  |   |   | √ | 1 | Retained |

**Notes:** - '√' indicates that the item fails to meet the criterion for that specific analysis method.  
- Critical Ratio Method = independent samples t-test comparing high- and low-scoring groups.  
- Correlation Analysis = item-total correlation test.  
- Cronbach's Alpha Coefficient ( $\alpha$ ) = assessing internal consistency reliability.  
- Communality and Factor Loading Analysis = evaluating the shared variance and factor loading of each item.

**Table S4:** Cronbach's  $\alpha$  Coefficient for the Overall Questionnaire and Each Dimension (n = 260)

| <b>Item</b>                        | <b>Number of Items</b> | <b>Cronbach's <math>\alpha</math> Coefficient</b> |
|------------------------------------|------------------------|---------------------------------------------------|
| <b>Knowledge Dimension (K)</b>     | 18                     | 0.940                                             |
| <b>Attitude Dimension (A)</b>      | 10                     | 0.868                                             |
| <b>Practice Dimension (P)</b>      | 5                      | 0.822                                             |
| <b>Overall Questionnaire (KAP)</b> | 33                     | 0.948                                             |

**Table S5:** Component Matrix after Rotation from the Second Exploratory Factor Analysis for the Knowledge Dimension

| <b>Item</b> | <b>Questionnaire Item</b>                                                                                                   | <b>factor loading</b> |                 |                 |
|-------------|-----------------------------------------------------------------------------------------------------------------------------|-----------------------|-----------------|-----------------|
|             |                                                                                                                             | <b>Factor 1</b>       | <b>Factor 2</b> | <b>Factor 3</b> |
| <b>K4</b>   | Periodontitis during pregnancy may increase the risk of adverse pregnancy outcomes (e.g., preterm birth, low birth weight). | <b>0.827</b>          | 0.130           | 0.277           |
| <b>K5</b>   | Severe pain or acute infection caused by oral diseases may trigger preterm birth or miscarriage.                            | <b>0.766</b>          | 0.205           | 0.256           |
| <b>K2</b>   | Oral diseases may affect the overall health of pregnant                                                                     | <b>0.731</b>          | 0.360           | 0.148           |

|            |                                                                                                                                                      |              |              |              |
|------------|------------------------------------------------------------------------------------------------------------------------------------------------------|--------------|--------------|--------------|
|            | women.                                                                                                                                               |              |              |              |
| <b>K3</b>  | Untreated severe dental caries in the mother may increase the risk of early childhood caries in her child.                                           | <b>0.730</b> | 0.172        | 0.363        |
| <b>K1</b>  | Pregnancy may exacerbate pre-existing oral diseases (e.g., periodontal disease).                                                                     | <b>0.664</b> | 0.418        | 0.083        |
| <b>K6</b>  | Women should visit the dental clinic before pregnancy for examination and treatment of existing oral diseases.                                       | 0.292        | <b>0.819</b> | 0.112        |
| <b>K8</b>  | Before dental treatment during pregnancy, an obstetrician should assess the pregnant woman's general health condition.                               | 0.216        | <b>0.804</b> | 0.213        |
| <b>K7</b>  | It is both safe and necessary for pregnant women with oral diseases to receive dental treatment during pregnancy.                                    | 0.328        | <b>0.676</b> | 0.357        |
| <b>K20</b> | If needed, panoramic radiographs can be taken during the second or third trimester, depending on the radiation dose.                                 | 0.158        | 0.144        | <b>0.853</b> |
| <b>K19</b> | If needed, periapical radiographs can be taken safely at any stage of pregnancy.                                                                     | 0.151        | 0.119        | <b>0.834</b> |
| <b>K18</b> | The radiation dose from a single periapical radiograph is approximately equivalent to 1–3 days of natural background radiation.                      | 0.180        | 0.013        | <b>0.822</b> |
| <b>K21</b> | Cone-beam computed tomography (CBCT) involves relatively higher radiation doses and should be used cautiously when alternative imaging is available. | 0.126        | 0.231        | <b>0.814</b> |
| <b>K17</b> | In principle, diagnostic dental radiographic examinations are safe throughout pregnancy.                                                             | 0.270        | 0.083        | <b>0.796</b> |
| <b>K16</b> | For oral infections during pregnancy, penicillin is the antibiotic of first choice.                                                                  | 0.472        | 0.123        | <b>0.711</b> |
| <b>K15</b> | For acute dental pain during pregnancy, paracetamol (acetaminophen) is the analgesic of first choice.                                                | 0.474        | 0.148        | <b>0.644</b> |
| <b>K12</b> | A reasonable dose of local dental anesthetic is safe for both                                                                                        | 0.275        | 0.294        | <b>0.623</b> |

|            |                                                                                                                                               |       |       |              |
|------------|-----------------------------------------------------------------------------------------------------------------------------------------------|-------|-------|--------------|
|            | pregnant women and the fetus, and can be used when needed during pregnancy.                                                                   |       |       |              |
| <b>K22</b> | During dental radiography, pregnant women should wear protective devices (e.g., lead aprons, thyroid collars) to minimize radiation exposure. | 0.090 | 0.257 | <b>0.602</b> |
| <b>K13</b> | Topical administration in dentistry (e.g., mouth rinses) is relatively safe during pregnancy.                                                 | 0.355 | 0.313 | <b>0.596</b> |

**Notes:** Factor Names: Factor 1: **The Severity of Dental Diseases During Pregnancy**; Factor 2: **Necessity of Dental treatment during pregnancy**; Factor 3: **oral medications and radiographic examinations during pregnancy**. Extraction method: Principal component analysis. Rotation method: Varimax with Kaiser normalization. a Rotation converged in 5 iterations.

**Table S6:** Component Matrix after Rotation from the Second Exploratory Factor Analysis for the Knowledge Dimension

| Item       | Questionnaire Item                                                                                                   | factor loading |              |
|------------|----------------------------------------------------------------------------------------------------------------------|----------------|--------------|
|            |                                                                                                                      | Factor 1       | Factor 2     |
| <b>A2</b>  | Do you think pregnant women with oral diseases should seek dental care promptly?                                     | <b>0.827</b>   | 0.113        |
| <b>A1</b>  | Do you agree that women should undergo dental examination and treatment for existing oral diseases before pregnancy? | <b>0.789</b>   | 0.168        |
| <b>A3</b>  | Do you believe dental treatment during pregnancy is safe?                                                            | <b>0.728</b>   | 0.168        |
| <b>A12</b> | Taking analgesics (paracetamol/acetaminophen as the first choice) during pregnancy?                                  | -0.008         | <b>0.859</b> |
| <b>A11</b> | Taking anti-inflammatory drugs (penicillin as the first choice) during pregnancy?                                    | -0.047         | <b>0.852</b> |
| <b>A13</b> | Receiving commonly used local dental anesthesia during pregnancy?                                                    | 0.290          | <b>0.839</b> |
| <b>A14</b> | Undergoing diagnostic dental radiographic examination during pregnancy?                                              | 0.214          | <b>0.838</b> |

|           |                                                                   |       |              |
|-----------|-------------------------------------------------------------------|-------|--------------|
| <b>A8</b> | Undergoing root canal treatment during pregnancy?                 | 0.306 | <b>0.664</b> |
| <b>A9</b> | Undergoing periodontal scaling and root planing during pregnancy? | 0.312 | <b>0.662</b> |
| <b>A5</b> | Undergoing dental cleaning during pregnancy?                      | 0.250 | <b>0.521</b> |

**Notes:** Factor Name: Factor 1: **Oral health management awareness** ; Factor 2: **Acceptance of dental diagnosis and treatment procedures during pregnancy**. Extraction method: Principal component analysis. Rotation method: Varimax with Kaiser normalization. a Rotation converged in 3 iterations.

**Table S7:** Component Matrix from the First Exploratory Factor Analysis for the Practice Dimension

| <b>Item</b> | <b>Questionnaire Item</b>                                                                                                                                                                     | <b>Factor loading</b> |
|-------------|-----------------------------------------------------------------------------------------------------------------------------------------------------------------------------------------------|-----------------------|
|             |                                                                                                                                                                                               | <b>Factor 1</b>       |
| <b>P4</b>   | You regularly visit the dental clinic for check-ups during pregnancy.                                                                                                                         | <b>0.804</b>          |
| <b>P5</b>   | You actively consult healthcare professionals about the safety of dental treatment during pregnancy.                                                                                          | <b>0.797</b>          |
| <b>P3</b>   | You underwent dental examination and treatment for existing oral diseases before pregnancy.                                                                                                   | <b>0.760</b>          |
| <b>P6</b>   | After being informed by healthcare professionals about the safety of dental treatment during pregnancy, you would accept routine dental care or emergency dental procedures during pregnancy. | <b>0.732</b>          |
| <b>P1</b>   | You have searched online for information on the potential harm of oral diseases during pregnancy to the mother and fetus.                                                                     | <b>0.727</b>          |

**Notes:** Extraction method: Principal component analysis. a One component was extracted.
